# Supplementary material
Source: publisher figshare collection journal article supplement (https://frontiersin.figshare.com/ndownloader/files/12296381)
Supplement: Supplementary file 1 [file 12296381]

# ***Supplementary Material:*** **Revealing In-operando Nanoparticle Transformation Dynamics in Lithium-ion Battery Cathodes using X-Ray Microbeam Diffraction**

## **1 SUPPLEMENTARY DATA**

Supplementary Material should be uploaded separately on submission. Please include any supplementary data, figures and/or tables.

Supplementary material is not typeset so please ensure that all information is clearly presented, the appropriate caption is included in the file and not in the manuscript, and that the style conforms to the rest of the article.

## **2 SUPPLEMENTARY TABLES AND FIGURES**

For more information on Supplementary Material and for details on the different file types accepted, please see the Supplementary Material section of the Author Guidelines.

### **2.1 Figures**

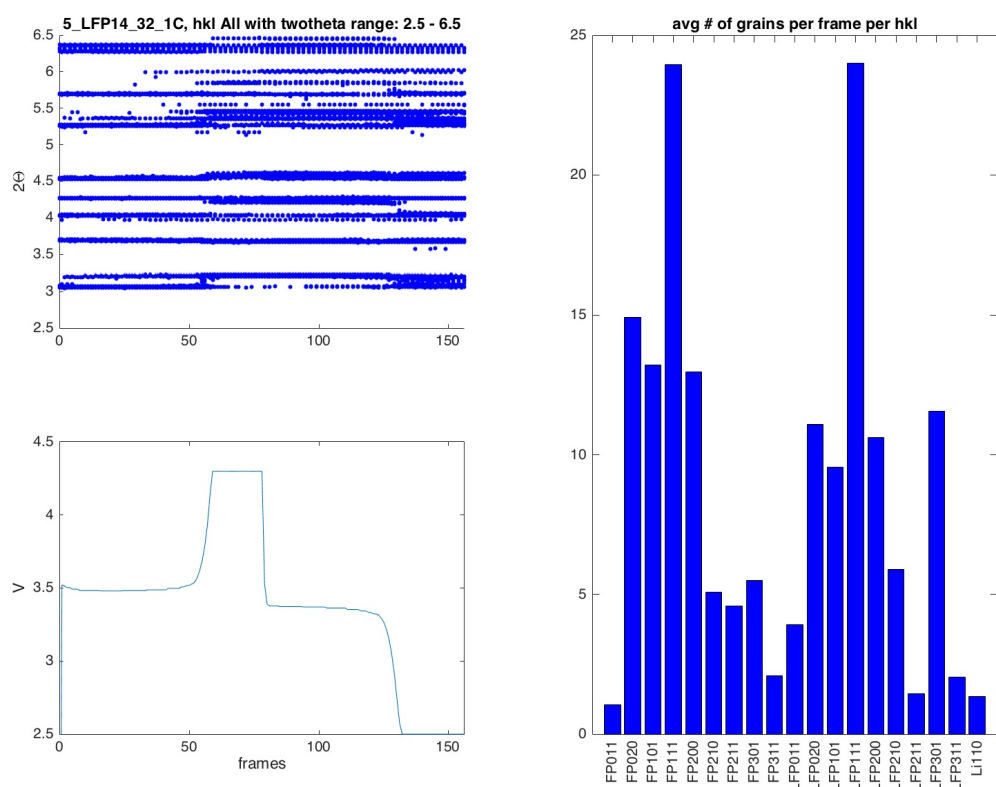

**Figure S1.** The average number of hkl reflections found per frame in an LFP 1C charge/discharge experiment.

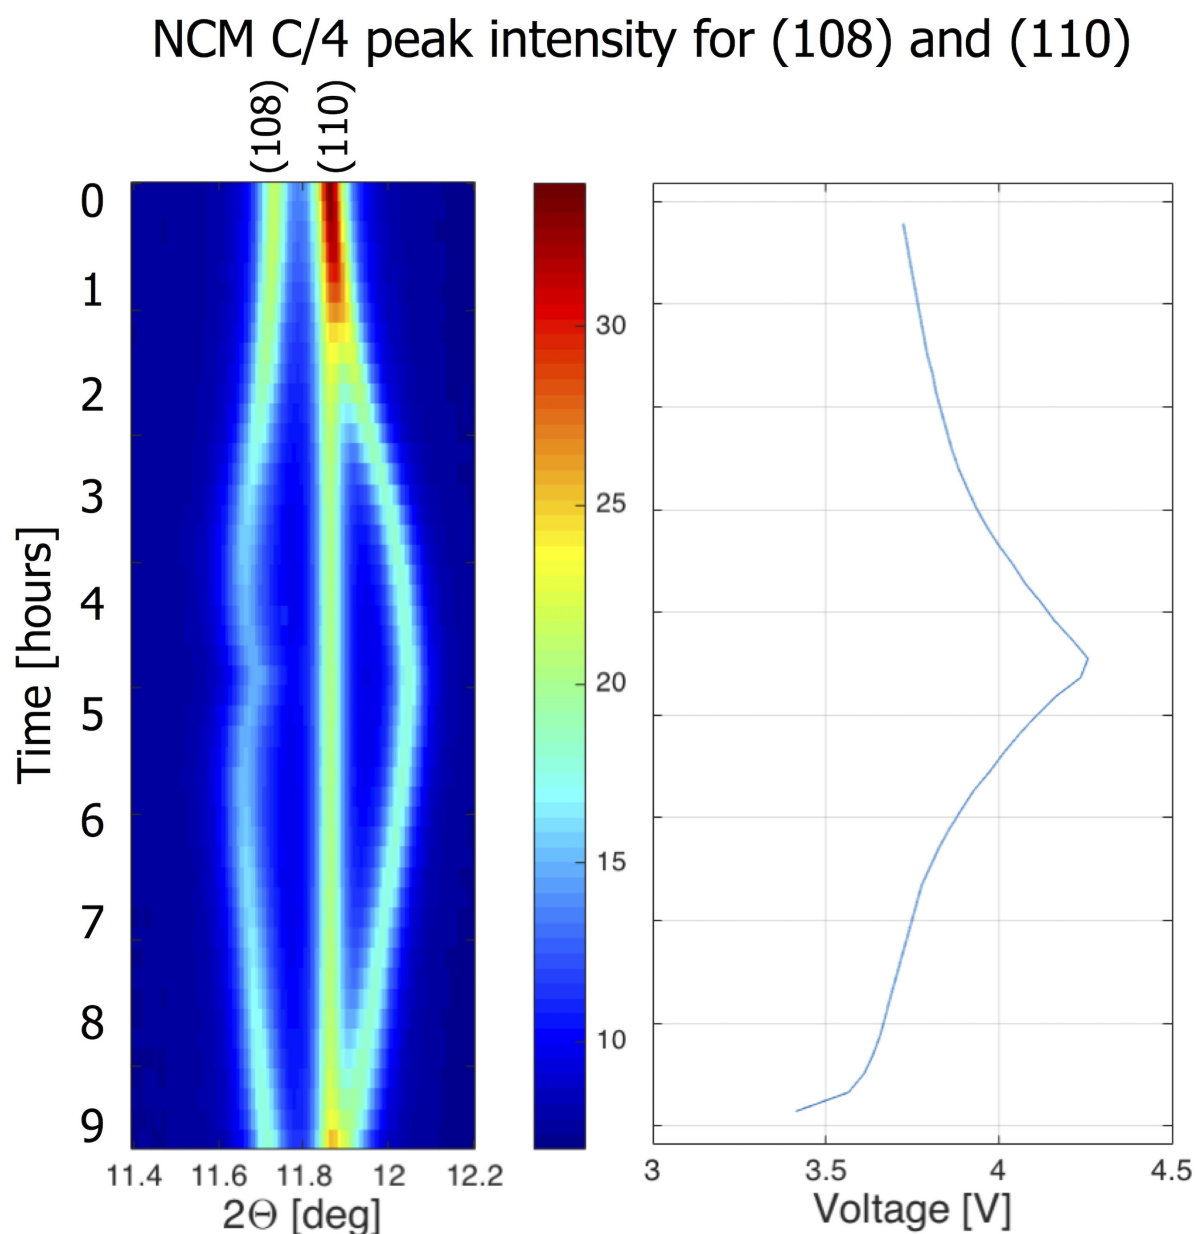

**Figure S2.** Time runs from top to bottom showing the reflection intensity in the left graph, and the electrochemistry in the right graph. Specifically the  $2\Theta$  angles for reflections (108) and (110) are shown for cathode material NCM. The (108) reflection is a clear line, moving from  $2\Theta = 11.75 - 11.6$  deg and back, with no intensity on either side. This shows that practically all diffracted grains are active. For the (110) reflection we see the same single line of intensity moving from  $2\Theta = 11.85 - 12.1$  deg and back. The straight vertical line at  $2\Theta = 11.85$  deg is an Al reflection.

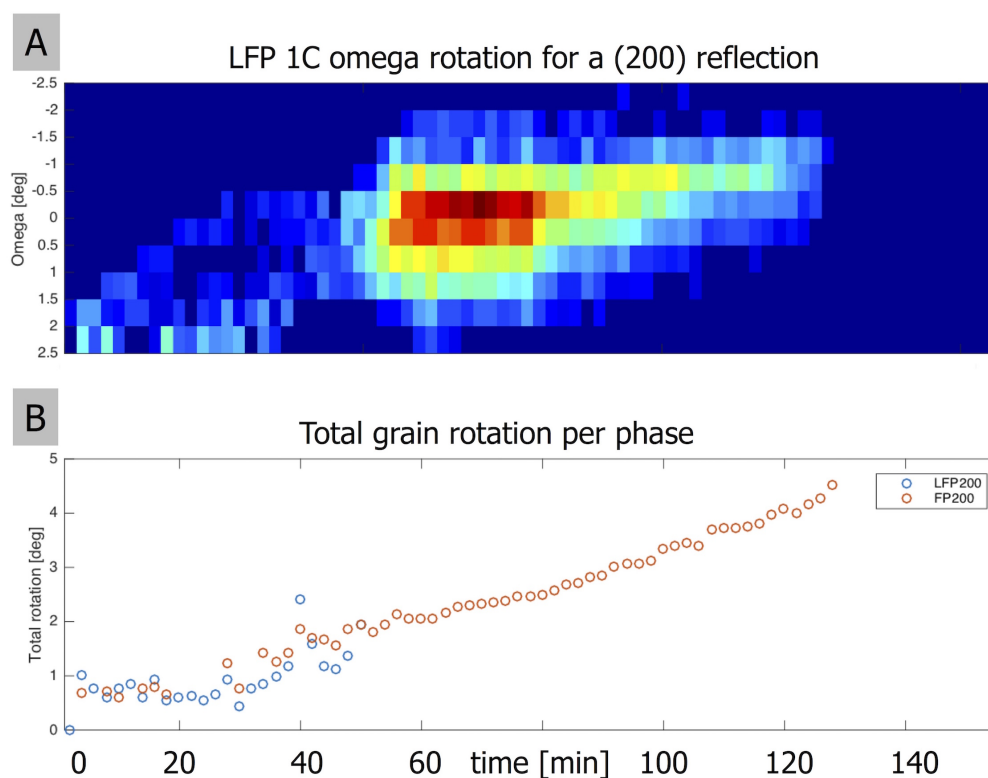

**Figure S3.** Showing the grain rotation of the reflection depicted in Figure 5A from the LFP 1C experiment. **A.** The intensity plot shows the grain rotation with regards to omega as a function of time during a 1C charge/discharge experiment. During charge (from  $t = 0 - 80$  min) this grain reflection rotates  $\sim 2.5$  deg from  $\omega = -2.5 - 0$  deg. After about  $t = 30$  min this reflection stays within the scanned omega range. **B** This graph shows the total grain rotation by combining the observed omega rotation and eta shift.

## 2.2 Tables

| Grain reflection | LFP 1C (200) | LFP 5C (210) | LFP 10C (020) | NCM C/4 (108) |
|------------------|--------------|--------------|---------------|---------------|
| expname          | ma3372       | ma3372       | ma3372        | ma2905        |
| expnr            | 5            | 6            | 7             | 32            |
| snapshot         | 2            | 2            | 2             | 1             |
| labelnr          | 343          | 163          | 322           | 2             |
| framenr          | 7            | 2            | 112           | 328           |
| point            | A            | A            | A             | B             |
| eta [deg]        | 305.4812     | 54.40147     | 285.08124     | 177.05272     |
| omega [deg]      | 1.25         | 0            | 0             | -2.75         |
| twotheta [deg]   | 3.05076      | 4.03857      | 5.44234       | 11.70879      |
| deviation [%]    | 0.20516      | 0.16235      | 0.24358       | 0.00434       |
| dspace [Å]       | 5.17511      | 3.90965      | 2.90171       | 1.44498       |
| hkl              | LFP(200)     | LFP(210)     | FP(020)       | L1.0(108)     |
| xmin             | 1183         | 1241         | 1145          | 144           |
| xmax             | 1190         | 1247         | 1157          | 148           |
| ymin             | 777          | 1324         | 525           | 1076          |
| ymax             | 783          | 1328         | 531           | 1081          |
| intensity        | 11668        | 4261         | 5373          | 1280          |

**Table S1.** For each experiment grain reflections were identified and stored. Typically up to a few hundred grain reflections per frame were identified. Here the reflection properties determined for each reflection are shown as an example. For each experiment, see Table 1, one of the identified reflections is shown. See 2.2.1 for the legenda, explaining the labels used in the first column.

| Labelname        | LFP 1C (200) | LFP 5C (101) | LFP 10C (301) | NCM C/4 (110) |
|------------------|--------------|--------------|---------------|---------------|
| expname          | ma3372       | ma3372       | ma3372        | ma2905        |
| expnr            | 5            | 6            | 7             | 32            |
| snapshot         | 2            | 2            | 2             | 1             |
| labelnr          | 1            | 180          | 58            | 159           |
| nr-of-refs       | 153          | 146          | 399           | 48            |
| min-framenr      | 0            | 7            | 0             | 7             |
| max-framenr      | 1224         | 206          | 416           | 383           |
| nr-of-hkl        | 2            | 2            | 2             | 1             |
| eta-initial      | 151.48807    | 23.83702     | 329.85486     | 166.15564     |
| eta-min          | 149.62868    | 20.71399     | 328.0957      | 166.15564     |
| eta-max          | 153.13777    | 24.11357     | 330.90073     | 166.56956     |
| eta-diff         | 3.5091       | 3.39958      | 2.80503       | 0.41391       |
| twotheta-initial | 3.06483      | 3.69421      | 5.69022       | 11.87241      |
| twotheta-min     | 3.06148      | 3.67387      | 5.69022       | 11.87241      |
| twotheta-max     | 3.22178      | 3.69421      | 5.85003       | 12.05916      |
| twotheta-diff    | 0.1603       | 0.02034      | 0.15982       | 0.18675       |
| omega-min        | -2.25        | 0            | 0             | -2.75         |
| omega-max        | 0.75         | 0            | 0             | -2.75         |
| xmin             | 761          | 1334         | 1471          | 142           |
| xmax             | 792          | 1355         | 1505          | 162           |
| ymin             | 1128         | 1130         | 726           | 1237          |
| ymax             | 1156         | 1170         | 766           | 1248          |

**Table S2.** Reflections found in different frames over time were labeled. See 2.2.1 for the legenda, explaining the labels used in the first column. For the (101) reflection set for the 5C experiment shown in the second column, the first (101) reflection for this grain was found in frame 7 and the last in frame 206. The  $\eta$  for the first reflection is 151.49 deg. This was used to scan for reflection with the same hkl and an  $\eta$  value close to the initial  $\eta$  value. A total of 146 reflections were found that way. The min/max of the  $2\theta$  and the difference is stored, a measure for how active this grain was. The nr-of-hkl indicates whether different phases were found. Here both LFP and FP phases were found with hkl (101) meaning a phase transition took place. The collected meta data gives the possibility to search for reflections sets with for instance phase transitions or with a large  $\eta$  shift. Typically for each experiment a few hundred reflection sets were found with more than twenty reflections.

| Charge/discharge experiment                       | LFP 1C | LFP 5C | LFP 10C | NCM C/4 |
|---------------------------------------------------|--------|--------|---------|---------|
| Constant-current charge cap. [mAh]                | 0.516  | 0.487  | 0.450   | 0.177   |
| Constant-current discharge cap. [mAh]             | 0.463  | 0.370  | 0.325   | 0.173   |
| Coulombic efficiency                              | 90%    | 76%    | 72%     | 98%     |
| Active material [mg]                              | 4.02   | 4.02   | 4.02    | 11.16   |
| Weight capacity charge [mAh/g]                    | 128    | 121    | 112     | 159     |
| Weight capacity discharge [mAh/g]                 | 115    | 92     | 81      | 155     |
| Cathode surface [cm <sup>2</sup> ]                | 1.29   | 1.29   | 1.29    | 1.29    |
| Active material loading [mg/cm <sup>2</sup> ]     | 3.12   | 3.12   | 3.12    | 8.67    |
| Surface capacity charge [mAh/cm <sup>2</sup> ]    | 0.40   | 0.38   | 0.35    | 1.38    |
| Surface capacity discharge [mAh/cm <sup>2</sup> ] | 0.36   | 0.29   | 0.25    | 1.35    |

**Table S3.** Overview of electrochemical details of the four different cycling experiments. For all three LFP experiments, 1C, 5C and 10C, one charge/discharge cycle was executed. The same cell for all three rates was used which was pre-cycled with a constant-current C/4 rate before the 1C experiment. For all three LFP experiments the following charge/discharge regime was used. Constant-current charge until voltage > 4.2 V, followed by constant-voltage = 4.2 V until  $I < 0.025$  mA. Constant-current discharge until voltage < 2.5 V, followed by constant-voltage = 2.5 V until  $I < 0.025$  mA. The Coulombic efficiency was calculated using only the capacities realized during the constant-current regime. For the NCM experiment one constant-current charge/discharge C/4 cycle was executed. This was the second cycle as this cell had also been pre-cycled with a constant-current C/4 rate.

## 2.2.1 Legenda for Tables S1 and S2

|                |                                                                                                         |
|----------------|---------------------------------------------------------------------------------------------------------|
| expname:       | reference to the ESRF name of the beam line reservation                                                 |
| expnr:         | experiment number for internal use                                                                      |
| snapshot:      | experiment sub-reference for internal use                                                               |
| labelnr:       | unique number that links grain reflections found in different frames                                    |
| framenr:       | frame number in which the reflection was found                                                          |
| point:         | y-z position of the sample that was probed with the X-ray beam                                          |
| eta:           | the angle $\eta$ (along the diffraction ring) of the reflection                                         |
| omega:         | the $\omega$ angle (z-rotation) of the sample                                                           |
| twotheta:      | the $2\Theta$ angle of the grain reflection                                                             |
| deviation:     | the deviation in pct from the equilibrium $2\Theta$ angle                                               |
| dspace:        | the dspace in Å of this reflection                                                                      |
| hkl:           | the miller index belonging to the reflection                                                            |
| xmin:          | the upper left corner (pixel number) of the rectangle drawn around the reflection                       |
| xmax:          | the lower left corner (pixel number) of the rectangle drawn around the reflection                       |
| ymin:          | the upper right corner (pixel number) of the rectangle drawn around the reflection                      |
| ymax:          | the lower right corner (pixel number) of the rectangle drawn around the reflection                      |
| intensity:     | cumulative intensity [a.u.] of all pixels belonging the the grain reflection                            |
| nr-of-refs:    | the number of reflections for this particular label (series of reflections belonging to the same grain) |
| eta-initial:   | the $\eta$ angle of the first reflection in the series                                                  |
| eta-min:       | the minimum $\eta$ angle of all reflection in the series                                                |
| eta-max:       | the minimum $\eta$ angle of all reflection in the series                                                |
| eta-diff:      | the difference between the minimum and maximum $\eta$ angle of all reflection in the series             |
| twotheta-min:  | the minimum $2\Theta$ angle of all reflection in the series                                             |
| twotheta-max:  | the minimum $2\Theta$ angle of all reflection in the series                                             |
| twotheta-diff: | the difference between the minimum and maximum $2\Theta$ angle of all reflection in the series          |
| omega-min:     | the minimum $\omega$ angle (z-rotation) this reflection was visible for                                 |
| omega-max:     | the maximum $\omega$ angle (z-rotation) this reflection was visible for                                 |



## 2.3 Total grain rotation

The total grain rotation is estimated using the change in  $\omega$  (rotation along the z-axis) and the shift in  $\eta$  (movement along the diffraction ring, i.e. rotation along the beam line or x-axis) with the following formula:

$$\text{total grain rotation} = \sqrt{(\Delta\omega)^2 + (\Delta\eta)^2} \quad (\text{S1})$$

where  $\Delta\omega = \omega_{\text{initial}} - \omega_{\text{current}}$   
and  $\Delta\eta = \eta_{\text{initial}} - \eta_{\text{current}}$   
using  $\sin(\alpha) \approx \alpha$  for small  $\alpha$ .
